# Supplementary material
Source: MDPI journal article supplement (https://www.mdpi.com/2673-8937/4/2/13)
Supplement: s1 [file s1]

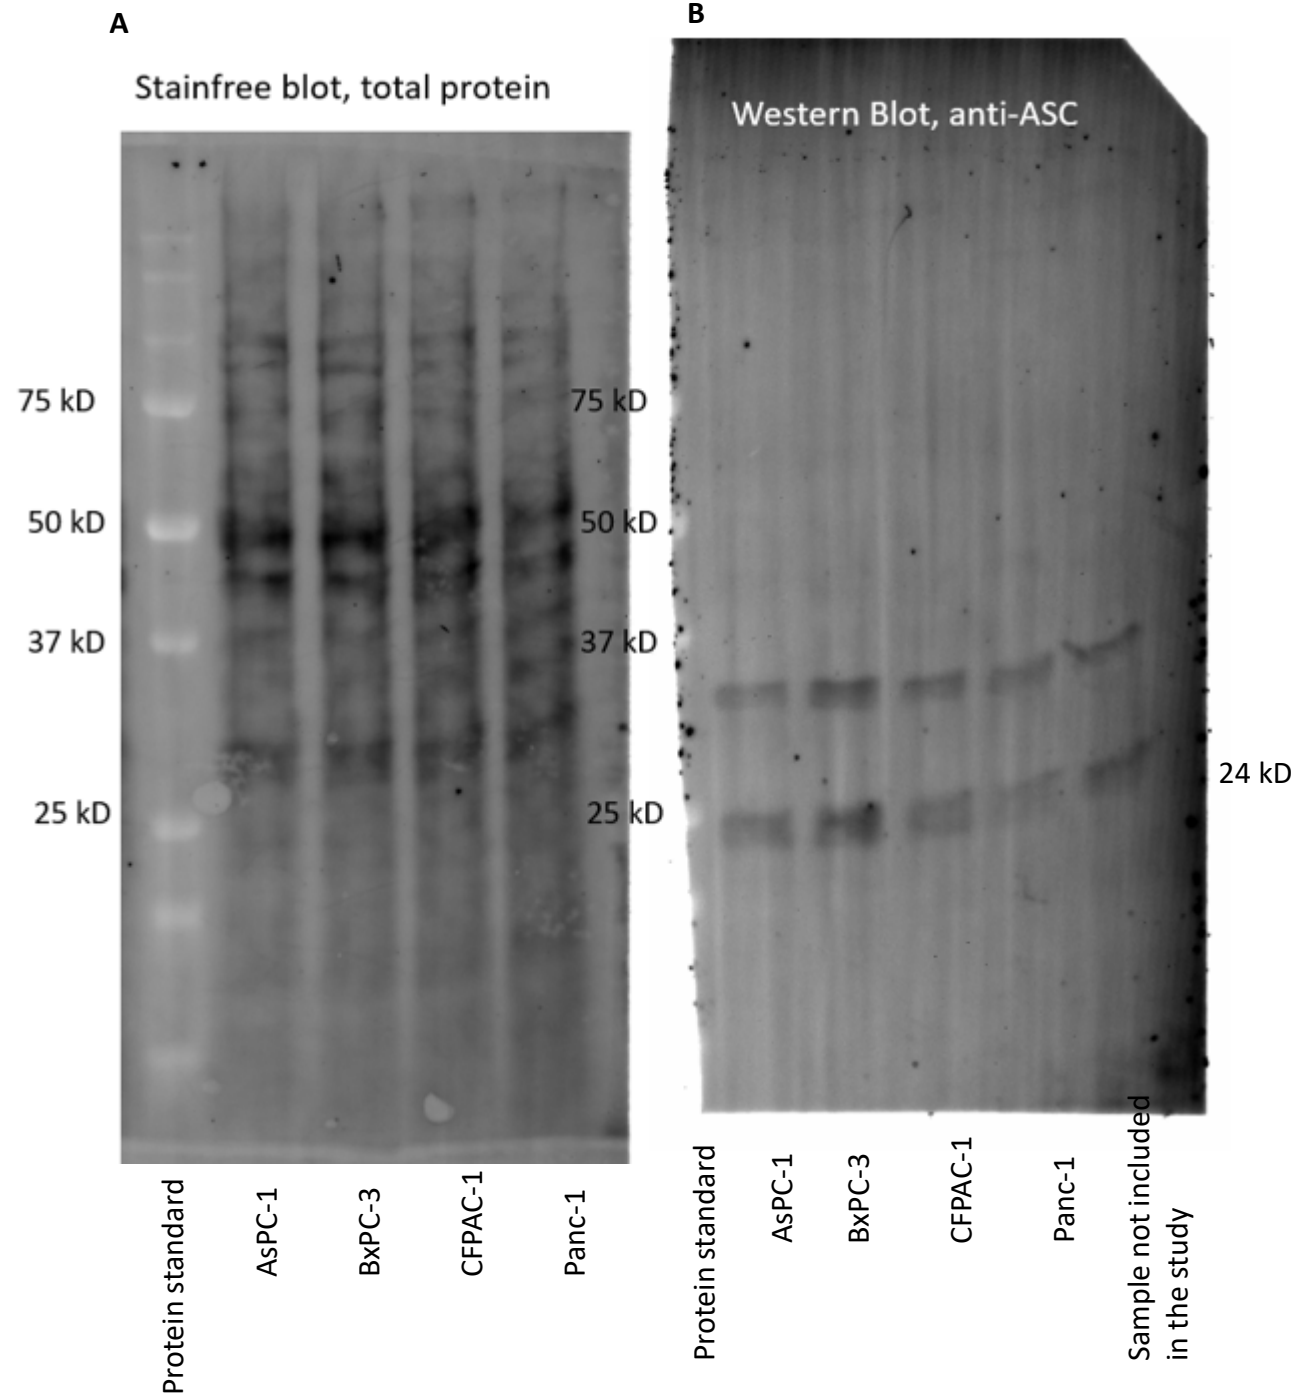

Figure S1. WB ASC. Figure 7 in manuscript. Basal protein expression of ASC. Protein standard (Precision Plus Protein™ All Blue Prestained Protein Standards #1610373, BioRad Laboratories Inc., California, USA). A) Total protein, B) Protein expression ASC.
